# Supplementary material for: Mapping Global Prevalence of Acinetobacter baumannii and Recent Vaccine Development to Tackle It
Source: MDPI journal article supplement (doi:10.3390/vaccines9060570), 2021-05-31
Supplement: s1 [file s1]

# Mapping Global Prevalence of the Opportunist *Acinetobacter baumannii* and Recent Vaccine Development to Tackle It

## Supplementary Materials

**Chaoying Ma and Siobhán McClean\***

School of Biomolecular and Biomedical Sciences, University College Dublin, Belfield, Dublin 4, D04 V1W8, Ireland;  
chaoying.ma@ucdconnect.ie (C.M.)

\* Correspondence: siobhan.mcclean@ucd.ie



**Table S1.** Type strains for the phylogenetic analysis of Acb complex

| <b>Species</b>          | <b>Type Strain</b> | <b>GenBank Accession</b> |
|-------------------------|--------------------|--------------------------|
| <i>A. baumannii</i>     | ATCC 19606         | HE651907                 |
| <i>A. calcoaceticus</i> | ATCC 23055         | AJ888984                 |
| <i>A. nosocomialis</i>  | RUH 2376           | NR_117931                |
| <i>A. pittii</i>        | DSM 21653          | NR_116774                |
| <i>A. seifertii</i>     | LUH 1472           | NR_134684                |
| <i>A. lactucae</i>      | NRRL B-41902       | NR_152004                |
| <i>A. oleivorans</i>    | DR1                | NR_102814                |
| <i>M. osloensis</i>     | DSM 6998           | AB643599                 |



**Table S2.** Worldwide data for percentage of carbapenem-resistant *A. baumannii* (R%)

| Country (Region)     | Area          | Sample Collected Year<br>(2009-2019) | R%                 | Reference           |
|----------------------|---------------|--------------------------------------|--------------------|---------------------|
| Armenia              | Middle East   | 2018 Full Year                       | 0% <sup>+</sup>    | RA [1]              |
| Belize               | Latin America | 2009-2017                            | 0%                 | RA <sup>1</sup> [2] |
| Finland              | Europe        | 2018 Full Year                       | 0%*                | SP <sup>2</sup> [3] |
| Iceland              | Europe        | 2018 Full Year                       | 0% <sup>+</sup>    | SP [3]              |
| Norway               | Europe        | 2018 Full Year                       | 0%                 | SP [3]              |
| Togo                 | Africa        | 2011.01-2012.12                      | 0% <sup>+</sup>    | RA [4]              |
| Ireland              | Europe        | 2018 Full Year                       | 1.8%               | SP [3]              |
| United Kingdom       | Middle East   | 2018 Full Year                       | 1.8%               | SP [3]              |
| Australia            | Oceania       | 2017 Full Year                       | 2.8%               | SP [5]              |
| Switzerland          | Europe        | 2018 Full Year                       | 3%                 | SP [1]              |
| Japan                | Asia          | 2018 Full Year                       | 3.5%               | SP [6]              |
| Sweden               | Europe        | 2018 Full Year                       | 3.7%               | SP [3]              |
| Belgium              | Europe        | 2018 Full Year                       | 3.8%               | SP [3]              |
| Austria              | Europe        | 2018 Full Year                       | 4.4%               | SP [3]              |
| Germany              | Europe        | 2018 Full Year                       | 4.4%               | SP [3]              |
| Netherlands          | Europe        | 2018 Full Year                       | 4.6%               | SP [3]              |
| Canada               | North America | 2018 Full Year                       | 4.7%               | SP [7]              |
| Denmark              | Europe        | 2018 Full Year                       | 6.4%               | SP [3]              |
| France               | Europe        | 2018 Full Year                       | 6.5%               | SP [3]              |
| New Zealand          | Oceania       | 2016 Full Year                       | 6.5%               | SP [8]              |
| Guyana               | Latin America | 2008.01-2014.12                      | 7.5%               | RA [9]              |
| Sierra Leone         | Africa        | 2018.02-2018.06                      | 8.7%*              | RA [10]             |
| Cambodia             | Asia          | 2007-2016                            | 11.1%*             | RA [11]             |
| Namibia              | Africa        | 2009.01-2012.05                      | 12.5% <sup>+</sup> | RA [12]             |
| Zimbabwe             | Europe        | 2012.01-2017.12                      | 15.4%              | RA [13]             |
| Benin                | Africa        | Specific Period Unknown              | 16% <sup>+</sup>   | RA [14]             |
| Equatorial Guinea    | Africa        | 2013.07-2016.01                      | 17.6%*             | RA [15]             |
| Slovenia             | Europe        | 2018 Full Year                       | 17.9%*             | SP [3]              |
| Czech Republic       | Europe        | 2018 Full Year                       | 19.8%              | SP [3]              |
| Dominican Republic   | Latin America | 2013 Full Year                       | 20%                | SP [16]             |
| Cameroon             | Africa        | 2005-2014                            | 21.1%              | RA [17]             |
| Honduras             | Latin America | 2013 Full Year                       | 23%                | SP [16]             |
| Grenada              | Latin America | 2015-2017                            | 25%                | RA [18]             |
| Jamaica              | Latin America | 2009.05-2010.04                      | 25.6%              | RA [19]             |
| Estonia              | Europe        | 2018 Full Year                       | 28.6%*             | SP [3]              |
| United Arab Emirates | Middle East   | 2017 Full Year                       | 29.4%              | SP [20]             |
| Portugal             | Europe        | 2018 Full Year                       | 30.7%              | SP [3]              |
| Ethiopia             | Africa        | 2018.04-2018.07                      | 33.3% <sup>+</sup> | RA [21]             |
| El Salvador          | Latin America | 2013                                 | 38%                | SP [16]             |
| Uganda               | Africa        | 2007.02-2009.09                      | 38%                | RA [22]             |
| Singapore            | Asia          | 2017 Full Year                       | 43.2%              | SP [23]             |
| Bangladesh           | Asia          | 2017.01-2018.01                      | 43.5%              | RA [24]             |
| Madagascar           | Africa        | 2006.09-2009.03                      | 44%                | RA [25]             |



|                 |               |                                     |        |         |
|-----------------|---------------|-------------------------------------|--------|---------|
| Slovakia        | Europe        | 2018 Full Year                      | 44.0%  | SP [3]  |
| Qatar           | Middle East   | 2012.01-2013.12                     | 45.6%  | RA [26] |
| Algeria         | Africa        | 2011.03-2011.07                     | 47.9%  | RA [27] |
| United States   | North America | 2009-2012                           | 47.9%  | RA [28] |
| Chile           | Latin America | 2010 Full Year                      | 48%    | SP [29] |
| Spain           | Europe        | 2018 Full Year                      | 54.3%  | SP [3]  |
| Hungary         | Europe        | 2018 Full Year                      | 55.2%  | SP [3]  |
| Philippines     | Asia          | 2018 Full Year                      | 56%    | SP [30] |
| Bolivia         | Latin America | 2013 Full Year                      | 57%    | SP [16] |
| Guatemala       | Latin America | 2013 Full Year                      | 57%    | SP [16] |
| Malaysia        | Asia          | 2017 Full Year                      | 61.2%  | SP [31] |
| Uruguay         | Latin America | 2010 Full Year                      | 64%    | SP [29] |
| Pakistan        | Middle East   | 2013-2015                           | 65%    | SP [32] |
| Poland          | Europe        | 2018 Full Year                      | 67.3%  | SP [3]  |
| Thailand        | Asia          | 2018 Full Year                      | 68.2%  | SP [33] |
| Egypt           | Africa        | Fall and Winter 2010<br>Spring 2015 | 70.3%  | RA [34] |
| Syria           | Middle East   | 2008.01-2011.06                     | 70.5%  | RA [35] |
| Taiwan          | Asia          | 2018 Full Year                      | 71.3%  | SP [36] |
| Kenya           | Africa        | 2013-2015                           | 72.8%  | RA [37] |
| Venezuela       | Latin America | 2013 Full Year                      | 71%    | SP [16] |
| Mauritius       | Africa        | 2014.07                             | 74%    | RA [38] |
| Saudi Arabia    | Middle East   | 2017 Full Year                      | 74%    | SP [39] |
| Bulgaria        | Europe        | 2018 Full Year                      | 74.5%  | SP [3]  |
| Ukraine         | Europe        | 2018 Full Year                      | 75%*   | SP [1]  |
| China           | Asia          | 2019 Full Year                      | 75.1%  | SP [40] |
| Morocco         | Africa        | 2012.04-2014.04                     | 76%    | RA [41] |
| Lebanon         | Middle East   | 2013.10-2015.12                     | 76.5%  | RA [42] |
| Paraguay        | Latin America | 2013 Full Year                      | 77%    | SP [16] |
| Brazil          | Latin America | 2017 Full Year                      | 77.7%  | SP [43] |
| Israel          | Middle East   | 2017 Full Year                      | 78%    | RA [44] |
| North Macedonia | Europe        | 2018 Full Year                      | 78%*   | SP [1]  |
| Panama          | Latin America | 2013 Full Year                      | 78%    | SP [16] |
| Latvia          | Europe        | 2018 Full Year                      | 78.4%  | SP [3]  |
| Moldova         | Europe        | Specific Period Unknown             | 78.7%  | RA [45] |
| Albania         | Europe        | 2018.02-2018.05                     | 78.9%* | RA [46] |
| Nicaragua       | Latin America | 2013 Full Year                      | 80%    | SP [16] |
| Russia          | Europe        | 2018 Full Year                      | 79%    | SP [1]  |
| Italy           | Europe        | 2018 Full Year                      | 79.2%  | SP [3]  |
| Mexico          | North America | 2018.01-2018.06                     | 79.6%  | RA [47] |
| Indonesia       | Asia          | 2017 Full Year                      | 80.0%  | SP [48] |
| South Africa    | Africa        | 2017 Full Year                      | 81%    | SP [49] |
| Iran            | Middle East   | 2001-2013                           | 81.5%  | RA [50] |
| Argentina       | Latin America | 2018 Full Year                      | 82.9%  | SP [51] |
| Ecuador         | Latin America | 2013 Full Year                      | 83%    | SP [16] |
| Cuba            | Latin America | 2013 Full Year                      | 84%    | SP [16] |



|                        |               |                         |                   |         |
|------------------------|---------------|-------------------------|-------------------|---------|
| Iraq                   | Middle East   | 2014.12-2015.05         | 84%               | RA [52] |
| Cyprus                 | Europe        | 2018 Full Year          | 84.2%             | SP [3]  |
| Vietnam                | Asia          | 2012-2014               | 84.4%             | RA [53] |
| Kazakhstan             | Asia          | 2012-2015               | 84.5%             | RA [54] |
| India                  | Asia          | 2019 Full Year          | 84.8%             | SP [55] |
| Oman                   | Middle East   | 2018 Full Year          | 84.9%             | SP [56] |
| Romania                | Europe        | 2018 Full Year          | 85.3%             | SP [3]  |
| Nigeria                | Africa        | Specific Period Unknown | 85.7%*            | RA [57] |
| Montenegro             | Europe        | 2018 Full Year          | 86%*              | SP [1]  |
| Nepal                  | Asia          | 2017 Full Year          | 86%               | RA [58] |
| Kuwait                 | Middle East   | 2015.03-2016.06         | 87.0%             | RA [59] |
| Tunisia                | Africa        | 2013-2016               | 87.1%             | RA [60] |
| Libya                  | Africa        | 2013.04-2014.04         | 87.8%*            | RA [61] |
| Rwanda                 | Africa        | 2013 Full Year          | 88%               | RA [62] |
| Georgia                | Europe        | 2018 Full Year          | 89%               | SP [1]  |
| Kosovo                 | Europe        | 2018 Full Year          | 89%               | SP [1]  |
| Sudan                  | Africa        | 2011.07-2014.08         | 89%               | RA [63] |
| Lithuania              | Europe        | 2018 Full Year          | 89.8%             | SP [3]  |
| Yemen                  | Middle East   | 2012.10-2013.09         | 90%               | RA [64] |
| Turkey                 | Europe        | 2018 Full Year          | 92%               | SP [1]  |
| South Korea            | Asia          | 2017 Full Year          | 92.1%             | SP [65] |
| Greece                 | Europe        | 2018 Full Year          | 92.4%             | SP [3]  |
| Bosnia and Herzegovina | Europe        | 2018 Full Year          | 93%               | SP [1]  |
| Belarus                | Europe        | 2018 Full Year          | 94%               | SP [1]  |
| Croatia                | Europe        | 2018 Full Year          | 95.5%             | SP [3]  |
| Serbia                 | Europe        | 2018 Full Year          | 96%               | SP [1]  |
| Colombia               | Latin America | 2019 Full Year          | 97.0%             | SP [66] |
| Jordan                 | Middle East   | 2009.05-2010.02         | 97%               | RA [67] |
| Peru                   | Latin America | 2014.02-2016.04         | 97.5%             | RA [68] |
| Palestine              | Middle East   | 2006.01-2014.02         | 98%               | RA [69] |
| Botswana               | Africa        | 2017 Full Year          | 100%*             | RA [70] |
| Ghana                  | Africa        | 2015.02-2015.08         | 100% <sup>+</sup> | RA [71] |
| Myanmar                | Asia          | 2015.12-2018.01         | 100%              | RA [72] |
| Sri Lanka              | Asia          | 2013 Full Year          | 100%*             | SP [73] |
| Timor-Leste            | Asia          | 2017.03-2017.06         | 100% <sup>+</sup> | RA [74] |
| Armenia                | Middle East   | N/A <sup>3</sup>        |                   |         |
| Azerbaijan             | Middle East   | N/A                     |                   |         |
| Brunei Darussalam      | Asia          | N/A                     |                   |         |
| Laos                   | Asia          | N/A                     |                   |         |
| Luxembourg             | Europe        | N/A                     |                   |         |
| Malta                  | Europe        | N/A                     |                   |         |
| Afghanistan            | Middle East   | N/A                     |                   |         |
| Andorra                | Europe        | N/A                     |                   |         |
| Angola                 | Africa        | N/A                     |                   |         |
| Antigua and Barbuda    | Latin America | N/A                     |                   |         |



|                                     |               |     |
|-------------------------------------|---------------|-----|
| Bahamas                             | Latin America | N/A |
| Bahrain                             | Middle East   | N/A |
| Barbados                            | Latin America | N/A |
| Bhutan                              | Asia          | N/A |
| Burkina Faso                        | Africa        | N/A |
| Burundi                             | Africa        | N/A |
| Cabo Verde                          | Africa        | N/A |
| Central African<br>Republic         | Africa        | N/A |
| Chad                                | Africa        | N/A |
| Comoros                             | Africa        | N/A |
| Congo (Congo-<br>Brazzaville)       | Africa        | N/A |
| Costa Rica                          | Latin America | N/A |
| Cote d'Ivoire                       | Africa        | N/A |
| Democratic Republic<br>of the Congo | Africa        | N/A |
| Djibouti                            | Africa        | N/A |
| Dominica                            | Latin America | N/A |
| Eritrea                             | Africa        | N/A |
| Eswatini (Swaziland)                | Africa        | N/A |
| Fiji                                | Oceania       | N/A |
| Gabon                               | Africa        | N/A |
| Gambia                              | Africa        | N/A |
| Guinea                              | Africa        | N/A |
| Haiti                               | Latin America | N/A |
| Kiribati                            | Oceania       | N/A |
| Kyrgyzstan                          | Asia          | N/A |
| Lesotho                             | Africa        | N/A |
| Liberia                             | Africa        | N/A |
| Liechtenstein                       | Europe        | N/A |
| Malawi                              | Africa        | N/A |
| Maldives                            | Asia          | N/A |
| Mali                                | Africa        | N/A |
| Marshall Islands                    | Oceania       | N/A |
| Mauritania                          | Africa        | N/A |
| Micronesia                          | Oceania       | N/A |
| Monaco                              | Europe        | N/A |
| Mongolia                            | Asia          | N/A |
| Mozambique                          | Africa        | N/A |
| Nauru                               | Oceania       | N/A |
| Niger                               | Africa        | N/A |
| North Korea                         | Asia          | N/A |
| Palau                               | Oceania       | N/A |
| Papua New Guinea                    | Oceania       | N/A |
| Saint Kitts and Nevis               | Latin America | N/A |



|                                  |               |     |
|----------------------------------|---------------|-----|
| Saint Lucia                      | Latin America | N/A |
| Saint Vincent and the Grenadines | Latin America | N/A |
| Samoa                            | Oceania       | N/A |
| San Marino                       | Europe        | N/A |
| Sao Tome and Principe            | Africa        | N/A |
| Senegal                          | Africa        | N/A |
| Seychelles                       | Africa        | N/A |
| Solomon Islands                  | Oceania       | N/A |
| Somalia                          | Africa        | N/A |
| South Sudan                      | Africa        | N/A |
| Suriname                         | Latin America | N/A |
| Tajikistan                       | Asia          | N/A |
| Tanzania                         | Africa        | N/A |
| Tonga                            | Oceania       | N/A |
| Trinidad and Tobago              | Latin America | N/A |
| Turkmenistan                     | Asia          | N/A |
| Tuvalu                           | Oceania       | N/A |
| Uzbekistan                       | Asia          | N/A |
| Vanuatu                          | Oceania       | N/A |
| Vatican                          | Europe        | N/A |
| Zambia                           | Africa        | N/A |

1. Data sources are national or regional AMR surveillance programs.

2. Data sources are research or review articles.

3. No surveillance or research data available for the selected time range.

\* A small number of isolates was tested ( $n < 30$ ), and the percentage resistance should be interpreted with caution.

† Less than 10 isolates reported, and the percentage resistance should be interpreted with extreme caution.

$R\% = (\text{Number of Carbapenem-resistant } A. baumannii \text{ Isolates}) / (\text{Number of } A. baumannii \text{ Isolates})$

The sample collecting methods, susceptibility testing methods and evaluating criteria may vary in different countries (regions). Antibiotics used in the susceptibility tests usually are imipenem (10 µg for disk diffusion test) and meropenem (10 µg).



**Table S3.** European data (2018) for R% and F%

| <b>Country (Region)</b>   | <b>R%</b> | <b>F%</b> <small>Data sources: [1, 3]</small> |
|---------------------------|-----------|-----------------------------------------------|
| Armenia                   | 0%        | 2.27%                                         |
| Finland                   | 0.0%      | 0.28%                                         |
| Iceland                   | 0.0%      | 0.52%                                         |
| Norway                    | 0.0%      | 0.41%                                         |
| Togo                      | 0%        | 3.00%                                         |
| Ireland                   | 1.7%      | 0.96%                                         |
| United Kingdom            | 1.8%      | 1.21%                                         |
| Switzerland               | 3%        | 0.60%                                         |
| Sweden                    | 3.7%      | 0.44%                                         |
| Belgium                   | 3.8%      | 1.26%                                         |
| Austria                   | 4.4%      | 0.73%                                         |
| Germany                   | 4.4%      | 1.10%                                         |
| Netherlands               | 4.6%      | 0.86%                                         |
| Denmark                   | 6.4%      | 0.48%                                         |
| France                    | 6.5%      | 1.69%                                         |
| Slovenia                  | 17.9%     | 1.17%                                         |
| Czech Republic            | 19.8%     | 0.97%                                         |
| Estonia                   | 28.6%     | 0.79%                                         |
| Portugal                  | 30.7%     | 0.78%                                         |
| Slovakia                  | 44.0%     | 4.88%                                         |
| Spain                     | 54.3%     | 0.49%                                         |
| Hungary                   | 55.2%     | 4.86%                                         |
| Poland                    | 67.3%     | 3.62%                                         |
| Bulgaria                  | 74.5%     | 8.59%                                         |
| Ukraine                   | 75%       | 18.71%                                        |
| North Macedonia           | 78%       | 10.23%                                        |
| Latvia                    | 78.4%     | 4.16%                                         |
| Russia                    | 79%       | 15.11%                                        |
| Italy                     | 79.2%     | 3.23%                                         |
| Cyprus                    | 84.2%     | 9.72%                                         |
| Romania                   | 85.3%     | 8.91%                                         |
| Montenegro                | 86%       | 10.29%                                        |
| Georgia                   | 89%       | 15.41%                                        |
| Kosovo                    | 89%       | 34.50%                                        |
| Lithuania                 | 89.8%     | 3.27%                                         |
| Turkey                    | 92%       | 13.33%                                        |
| Greece                    | 92.4%     | 14.26%                                        |
| Bosnia and<br>Herzegovina | 93%       | 12.91%                                        |
| Belarus                   | 94%       | 21.97%                                        |
| Croatia                   | 95.5%     | 5.69%                                         |
| Serbia                    | 96%       | 18.67%                                        |



## Reference

1. WHO Regional Office for Europe, Central Asian and European Surveillance of Antimicrobial Resistance Annual Report 2019. 2019.
2. Tuyud, V. and T. Thiagarajan, Antimicrobial Susceptibility Patterns of Pathogens Isolated from Surgical Site Infections at Public Health Facilities in Belize. *BIOLOGY THESES REPOSITORY*, 2019. 1(1).
3. European Centre for Disease Prevention and Control, Surveillance of antimicrobial resistance in Europe 2018: Annual report of the European Antimicrobial Resistance Surveillance Network (EARS-Net). 2019.
4. Bossa, Y., et al., Antibiotic resistance profile of bacteria isolated from patients admitted with postoperative infection in a regional hospital center in Togo. *African Journal of Microbiology Research*, **2014**. 8(44): p. 3702-3709.
5. Australian Commission on Safety and Quality in Health Care, Third Australian report on antimicrobial use and resistance in human health. 2019.
6. 薬剤耐性ワンヘルス動向調査検討会, 薬剤耐性ワンヘルス動向調査年次報告書 2019 Nippon AMR One Health Report (NAOR) 2019. 2019, 日本厚生労働省.
7. Public Health Agency of Canada, Canadian Antimicrobial Resistance Surveillance System Report. 2020, Public Health Agency of Canada.
8. Science for Communities, New Zealand Public Health Surveillance Report: Antimicrobial susceptibility data from hospital and community laboratories, 2017. 2017, New Zealand Ministry of Health.
9. Mahamat, A., et al., Clinical epidemiology and resistance mechanisms of carbapenem-resistant *Acinetobacter baumannii*, French Guiana, 2008-2014. *Int J Antimicrob Agents*, **2016**. 48(1): p. 51-55.
10. Lakoh, S., et al., Antibiotic resistance in patients with clinical features of healthcare-associated infections in an urban tertiary hospital in Sierra Leone: a cross-sectional study. *Antimicrob Resist Infect Control*, **2020**. 9(1): p. 38.
11. Fox-Lewis, A., et al., Antimicrobial Resistance in Invasive Bacterial Infections in Hospitalized Children, Cambodia, 2007-2016. *Emerg Infect Dis*, **2018**. 24(5): p. 841-851.
12. Mengistu, A., et al., Antimicrobial sensitivity patterns of cerebrospinal fluid (CSF) isolates in Namibia: implications for empirical antibiotic treatment of meningitis. *Journal of pharmaceutical policy and practice*, **2013**. 6(1): p. 4.
13. Mhondoro, M., et al., Trends in antimicrobial resistance of bacterial pathogens in Harare, Zimbabwe, 2012-2017: a secondary dataset analysis. *BMC Infectious Diseases*, **2019**. 19(1): p. 1-9.
14. Dougnon, V.T., et al., Infection Risks and Antimicrobial Resistance in Tertiary Hospitals in Benin: Study Cases of Sakété-Ifangni and Menontin Hospitals. *International Journal of Infection*, **2020**. 7(1).
15. Shatalov A, et al., Low Efficiency of the Commonly Prescribed Drugs against *Klebsiella pneumoniae*, *Escherichia coli* and *Acinetobacter* Species as the Causative Agents of Blood Stream Infection in Malabo, Equatorial Guinea. *Advances in Microbiology*. **2016**;6(03):162.
16. Sociedade Brasileira de Parasitologia, Revista de Patologia Tropical: Red Latinoamericana de Vigilancia de la Resistencia a los Antimicrobianos. 2014, Instituto de Patologia Tropical Sociedade Brasileira de Parasitologia.
17. Okalla Ebongue, C., Antimicrobial Multi-Resistance of *Acinetobacter baumannii* Isolated from Clinical Specimens in Douala (Cameroon). *Journal of Diseases and Medicinal Plants*, **2015**. 1(2): p. 31.
18. Sharma, D., S.E. Preston, and R. Hage, Emerging Antibiotic Resistance to Bacterial Isolates from Human Urinary Tract Infections in Grenada. *Cureus*, **2019**. 11(9): p. e5752.
19. Thoms-Rodriguez, C., et al., Detection of OXA Carbapenemase Positive *Acinetobacter* spp., Jamaica. *West Ind Med J*, **2016**.
20. UAE AMR Surveillance Sub-Committee, Updates on AMR Surveillance in the UAE. in UAE International Conference on Antimicrobial Resistance. 2018.
21. Motbainor, H., F. Bereded, and W. Mulu, Multi-drug resistance of blood stream, urinary tract and surgical site nosocomial infections of *Acinetobacter baumannii* and *Pseudomonas aeruginosa* among patients hospitalized at Felegehiwot referral hospital, Northwest Ethiopia: a cross-sectional study. *BMC Infect Dis*, **2020**. 20(1): p. 92.
22. Kateete, D.P., et al., Carbapenem resistant *Pseudomonas aeruginosa* and *Acinetobacter baumannii* at Mulago Hospital in Kampala, Uganda (2007-2009). *Springerplus*, 2016. 5(1): p. 1308.
23. One Health Antimicrobial Resistance Working Group, One Health Report on Antimicrobial Utilisation and Resistance, 2017. 2019, National Centre for Infectious Diseases.
24. Ifa, I., et al., Isolation of *Acinetobacter* species from Clinical Specimens with Detection of Their Antimicrobial Susceptibility Pattern from a Tertiary Care Hospital, Bangladesh. *Mymensingh Medical Journal: MMJ*, **2020**. 29(3): p. 622-627.
25. Andriamanantena, T.S., et al., Dissemination of multidrug resistant *Acinetobacter baumannii* in various hospitals of Antananarivo Madagascar. *Annals of clinical microbiology and antimicrobials*, **2010**. 9(1): p. 17.
26. Al Samawi, M.S., et al., *Acinetobacter* Infections among Adult Patients in Qatar: A 2-Year Hospital-Based Study. *Can J Infect Dis Med Microbiol*, **2016**. 2016: p. 6873689.
27. Bakour, S., et al., Antibiotic resistance determinants of multidrug-resistant *Acinetobacter baumannii* clinical isolates in Algeria. *Diagnostic Microbiology and Infectious Disease*, **2013**. 76(4): p. 529-531.
28. Zilberberg, M.D., M.H. Kollef, and A.F. Shorr, Secular trends in *Acinetobacter baumannii* resistance in respiratory and blood stream specimens in the United States, 2003 to 2012: A survey study. *J Hosp Med*, **2016**. 11(1): p. 21-6.
29. Sociedade Brasileira de Parasitologia, Revista de Patologia Tropical: Red Latinoamericana de Vigilancia de la Resistencia a los Antimicrobianos. 2011, Instituto de Patologia Tropical Sociedade Brasileira de Parasitologia.



30. ARSP, Antimicrobial Resistance Surveillance Program 2018 Annual Report. 2019, Department of Health (Philippines), Reserach Insititute for Tropical Medicine, Antimicrobial Resistance Surveillance Research Laboratory.
31. Antibiotic Resistance Surveillance Reference Laboratory, National Antibiotic Resistance Surveillance Annual Report 2017. 2018, Bacteriology Unit, Infectious Diseases Research Centre, Institute for Medical Research.
32. Global Antibiotic Resistance Partnership, Situation Analysis Report on Antimicrobial Resitance in Pakistan: Findings and Recommendations for Antibiotics Use and Resistance. 2017, Center for Disease Dynamics, Econmoics & Policy.
33. Styles, K.M., et al., Investigating Bacteriophages Targeting the Opportunistic Pathogen *Acinetobacter baumannii*. *Antibiotics* (Basel), **2020**. 9(4).
34. Abouelfetouh, A., A.S. Torky, and E. Aboulmagd, Phenotypic and genotypic characterization of carbapenem-resistant *Acinetobacter baumannii* isolates from Egypt. *Antimicrob Resist Infect Control*, **2019**. 8: p. 185.
35. Hamzeh, A.R., M. Al Najjar, and M. Mahfoud, Prevalence of antibiotic resistance among *Acinetobacter baumannii* isolates from Aleppo, Syria. *Am J Infect Control*, **2012**. 40(8): p. 776-7.
36. 台灣院內感染監視資訊系統 (TNIS), 邁向全球衛生安全-抗生素抗藥性管理行動策略計畫 (109 年至 113 年). 2019, 衛生福利部疾病管制署.
37. Musyoki, V.M., et al., Antimicrobial susceptibility pattern of *Acinetobacter* isolates from patients in Kenyatta National Hospital, Nairobi, Kenya. *The Pan African Medical Journal*, **2019**. 33.
38. Issack, M., Antibiotic resistance among hospitalized patients in Mauritius in 2014. *International Journal of Infectious Diseases*, **2016**. 45: p. 94.
39. Health, S.A.M.o., Summary Report of Antibigram Data from MOH Hospitals (2017). 2018.
40. CHINET 中国细菌耐药监测网, 2019 年 CHINET 三级医院细菌耐药监测. Available online: <http://www.chinets.com/Data/AntibioticDrugFast> (accessed on 14 September 2020).
41. Uwingabiye, J., et al., *Acinetobacter* infections prevalence and frequency of the antibiotics resistance: comparative study of intensive care units versus other hospital units. *Pan Afr Med J*, **2016**. 23: p. 191.
42. Al Atrouni, A., et al., Wide spread of OXA-23-producing carbapenem-resistant *Acinetobacter baumannii* belonging to clonal complex II in different hospitals in Lebanon. *Int J Infect Dis*, **2016**. 52: p. 29-36.
43. Agência Nacional de Vigilância Sanitária, Boletim Segurança do Paciente e Qualidade em Serviços de Saúde Nº 17: Incidentes Relacionados à Assistência à Saúde 2017. 2018, Brazilian Health Regulatory Agency.
44. Dickstein, Y., et al., Trends in antimicrobial resistance in Israel, 2014-2017. *Antimicrob Resist Infect Control*, **2019**. 8: p. 96.
45. Prisacari, V., et al., Rezultatele studiului de evaluare a antibioticorezistenței microbiene în condițiile Republicii Moldova. 2016.
46. Namiganda, V., et al., Antibiotic Resistance Pattern of *Acinetobacter baumannii* Strains Isolated from Different Clinical Specimens and Their Sensibility Against Bioactive Molecules Produced by Actinobacteria. *Arabian Journal for Science and Engineering*, **2019**. 44(7): p. 6267-6275.
47. Garza-Gonzalez, E., et al., A snapshot of antimicrobial resistance in Mexico. Results from 47 centers from 20 states during a six-month period. *PLoS One*, **2019**. 14(3): p. e0209865.
48. Dahehshdewi, A., A.K. Sugianli, and I. Parwati, The surveillance of antibiotics resistance in Indonesia: a current reports. *Bali Medical Journal*, **2019**. 8(2): p. 565.
49. National Department of Health, Surveillance for Antimicrobial Resistance and Consumption of Antibiotics in South Africa. 2018.
50. Moradi, J., F.B. Hashemi, and A. Bahador, Antibiotic Resistance of *Acinetobacter baumannii* in Iran: A Systemic Review of the Published Literature. *Osong Public Health Res Perspect*, **2015**. 6(2): p. 79-86.
51. Argentine Ministry of Health, Vigilancia de la Resistencia a los Antimicrobianos: Red Latinoamericana de Vigilancia de la Resistencia a los Antimicrobianos. 2018.
52. Al-Samaree, M.Y. and Z.M. Al-Khafaji, Antibigram of *Acinetobacter baumannii* isolated from Baghdad Hospitals. *Int. J. Adv. Res. Biol. Sci*, **2016**. 3(4): p. 238-242.
53. Anh, N.T., et al., Molecular epidemiology and antimicrobial resistance phenotypes of *Acinetobacter baumannii* isolated from patients in three hospitals in southern Vietnam. *Journal of medical microbiology*, **2017**. 66(1): p. 46-53.
54. Azizov, I., et al., The sensitivity to antibiotics of nosocomial strains of *acinetobacter baumanii* isolated in the tertiary hospitals in the Central Kazakhstan. *International Journal of Infectious Diseases*, **2016**. 45: p. 126.
55. Walia, K., V. Ohri, and A.K. Sahni, Annual Report Antimicrobial Resistance Surveillance and Research Network. 2020, Indian Council of Meidcal Research.
56. Directorate General for Diseases Surveillance and Control, Oman Antimicrobial Resistance Surveillance System Annual Report 2018. 2019, Ministry of Health, Oman.
57. Bashir, A., et al., Molecular characterization of *Acinetobacter baumannii* from patients with prolonged hospital stays in three tertiary hospitals of Kano Metropolis, Northwestern Nigeria. *African Journal of Microbiology Research*, **2019**. 13(27): p. 510-517.
58. Yadav, S.K., et al., Burden of Multidrug-Resistant *Acinetobacter baumannii* Infection in Hospitalized Patients in a Tertiary Care Hospital of Nepal. *Infect Drug Resist*, **2020**. 13: p. 725-732.
59. Al-Hashem, G., V.O. Rotimi, and M.J. Albert, Antimicrobial Resistance of Serial Isolates of *Acinetobacter baumannii* Colonizing the Rectum of Adult Intensive Care Unit Patients in a Teaching Hospital in Kuwait. *Microbial Drug Resistance*, 2020.



60. Cheikh, H.B., et al., Molecular characterization of carbapenemases of clinical *Acinetobacter baumannii*-calcoaceticus complex isolates from a University Hospital in Tunisia. *3 Biotech*, **2018**. 8(7): p. 297.
61. Mathlouthi, N., et al., Emergence of carbapenem-resistant *Pseudomonas aeruginosa* and *Acinetobacter baumannii* clinical isolates collected from some Libyan hospitals. *Microbial Drug Resistance*, **2015**. 21(3): p. 335-341.
62. Carroll, M., et al., Five-Year Antimicrobial Susceptibility Trends Among Bacterial Isolates from a Tertiary Health-Care Facility in Kigali, Rwanda. *Am J Trop Med Hyg*, **2016**. 95(6): p. 1277-1283.
63. Omer, M.I., et al., Prevalence and resistance profile of *Acinetobacter baumannii* clinical isolates from a private hospital in Khartoum, Sudan. *Am J Microbiol Res*, **2015**. 3(2): p. 76-9.
64. Zabada, A.A.M., et al., *Acinetobacter baumannii* complex and its antibiotics susceptibility in selected hospital's intensive care units at Sana'a city-Yemen. *Glob Adv Res J Microbiol*, **2018**(3): p. 48-56.
65. Liu, C., et al., Antimicrobial resistance in South Korea: A report from the Korean global antimicrobial resistance surveillance system (Kor-GLASS) for 2017. *Journal of Infection and Chemotherapy*, **2019**. 25(11): p. 845-859.
66. Melendez R. and Jenifer C., Susceptibilidad antibiótica de bacterias aisladas de urocultivos de pacientes atendidos en el Hospital Regional Docente de Trujillo-La Libertad, 2019. **2019**.
67. Obeidat, N., et al., Major biologic characteristics of *Acinetobacter baumannii* isolates from hospital environmental and patients' respiratory tract sources. *Am J Infect Control*, **2014**. 42(4): p. 401-4.
68. Levy-Blitchtein, S., et al., Emergence and spread of carbapenem-resistant *Acinetobacter baumannii* international clones II and III in Lima, Peru. *Emerg Microbes Infect*, **2018**. 7(1): p. 119.
69. Handal, R., et al., Characterization of Carbapenem-Resistant *Acinetobacter baumannii* Strains Isolated from Hospitalized Patients in Palestine. *Int J Microbiol*, 2017. **2017**: p. 8012104.
70. Mpinda-Joseph, P., et al., Healthcare-associated infections including neonatal bloodstream infections in a leading tertiary hospital in Botswana. *Hosp Pract (1995)*, **2019**. 47(4): p. 203-210.
71. Agyepong, N., et al., Multidrug-resistant gram-negative bacterial infections in a teaching hospital in Ghana. *Antimicrob Resist Infect Control*, **2018**. 7: p. 37.
72. Tada, T., et al., Molecular epidemiology of multidrug-resistant *Acinetobacter baumannii* isolates from hospitals in Myanmar. *J Glob Antimicrob Resist*, **2020**. 22: p. 122-125.
73. Sri Lanka College of Microbiologists, National Surveillance of Antimicrobial Resistance Report to Ministry of Health. 2014, SLCM ARSP & NLBSA Technical Committees.
74. Marr, I., et al., Antimicrobial resistance in urine and skin isolates in Timor-Leste. *J Glob Antimicrob Resist*, **2018**. 13: p. 135-138.
